# Supplementary material for: TACO1 regulates mitochondrial adaptation in hypertension-induced cardiac remodeling and heart failure
Source: Research Square preprint supplement (doi:10.21203/rs.3.rs-9589283/v1), 2026-05-05
Supplement: Supplementary file 1 [file 4e704b1907493e624aa3abe6.docx]

Supporting Information

**TACO1 regulates mitochondrial adaptation in hypertension-induced cardiac remodeling and heart failure.**

Berwin Singh Swami Vetha1,2†, Ronald McMillan3†, James Marchant4†, Mohd Mabood Khan5, Joyonna Gamble‑George6,7,8,9, Jeremiah Afolabi10, Edgar Garza‑Lopez11, Andrea G. Marshall12, Calixto Pablo Hernandez Perez6, Dillon Garbrandt1, Bret Mobley12, Jenny Schafer13, Max Kushner13, Oleg Kovtun14, Debra D. Murray15, Tonya Zeczycki16, Annet Kirabo10˒17, Alexandre Colas4, Celestine Wanjalla2, Dao‑Fu Dai18, Melanie McReynolds19, Azeez Aileru1*, Antentor Hinton Jr.6*

†Co-first authors, *Co-corresponding authors and co-senior authors.

1Department of Foundational Science, East Carolina University, Greenville, NC, USA

2Department of Pharmacology and Toxicology, East Carolina University, Greenville, NC, USA

3Department of Medicine, Division of Infectious Diseases, Vanderbilt University Medical Center, Nashville, TN, USA

4Development, Aging and Regeneration Program, Sanford Burnham Prebys Medical Discovery Institute, La Jolla, CA, USA

5Department of Medicine, Division of Genetic Medicine & Clinical Pharmacology, Vanderbilt University Medical Center, Nashville, TN, USA

6Department of Computer Science, Whiting School of Engineering, Johns Hopkins University, Baltimore, MD 21218, USA

7Department of Epidemiology, Harvard T.H. Chan School of Public Health, Boston, MA 02115, USA

8Department of Social and Behavioral Sciences, Yale School of Public Health, New Haven, CT, 06520, USA

9Environmental Sciences Graduate Program, Oregon State University, Corvalis, OR 97331, USA

10Department of Molecular Physiology and Biophysics, Vanderbilt University, Nashville, TN, USA

11Department of Internal Medicine, University of Iowa, Iowa City, IA, USA

12Department of Pathology, Vanderbilt University Medical Center, Nashville, TN, USA

13Department of Cell and Developmental Biology, Vanderbilt University, Nashville, TN, USA

14Department of Chemistry, Vanderbilt University, Nashville, TN, USA

15Department of Molecular and Human Genetics, Baylor College of Medicine, Houston, TX, USA

16Department of Biochemistry and Molecular Biology, East Carolina University, Greenville, NC, USA

17Vanderbilt Institute for Global Health, Vanderbilt University Medical Center, Nashville, TN, USA

18Department of Pathology, Johns Hopkins University School of Medicine, Baltimore, MD, USA

19The Huck Institutes of the Life Sciences; Department of Biochemistry and Molecular Biology, Pennsylvania State University, University Park, PA, USA

Co-corresponding authors and co-senior authors.

**Antentor Hinton Jr., PhD**

Department of Molecular Physiology & Biophysics

Vanderbilt University, Nashville, TN, USA

Email: [antentor.o.hinton.jr@vanderbilt.edu](mailto:antentor.o.hinton.jr@vanderbilt.edu).

**Azeez Aileru.,** **PhD**

Department of Foundational Science,

East Carolina University, Greenville, NC, USA

Email: [ailerua19@ecu.edu](mailto:ailerua19@ecu.edu)

**
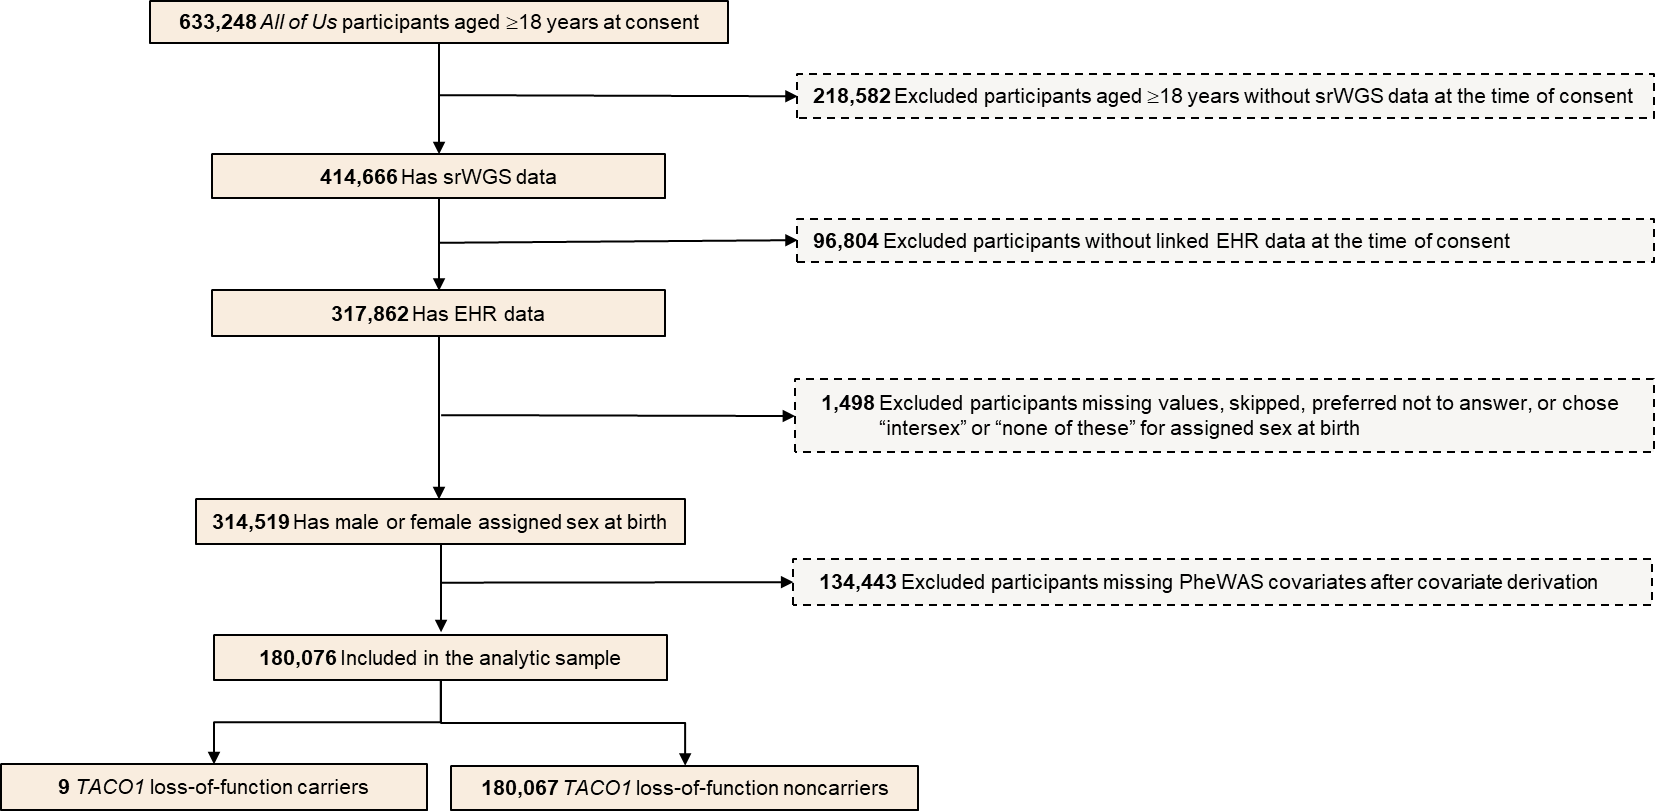
Figure S1. Flowchart of *TACO1* loss-of-function carrier cohort selection for covariate-adjusted PheWAS analysis from the *All of Us* Research Program.** Participants were selected from the *All of Us* Research Program using Controlled Tier Dataset version 8, including participants enrolled and consented through October 1, 2023. Among 633,248 participants aged ≥18 years at consent, participants without srWGS data, without linked EHR data, or with assigned sex at birth other than male or female or missing and declined responses were excluded. *TACO1* rare predicted LoF carriers were defined using variants annotated as frameshift, splice-acceptor, splice-donor, or stop-gained, with allele frequency ≤0.01. This yielded an initial eligible case-control cohort of 314,519 participants, including 24 *TACO1* LoF carriers and 314,495 noncarriers. After derivation of regression covariates and removal of participants with missing covariate data, the final covariate-complete analytic sample comprised 180,076 participants, including 9 *TACO1* LoF carriers and 180,067 noncarriers (controls). srWGS, short-read whole-genome sequencing; EHR, electronic health record; LoF, loss-of-function.

**Figure S2**: Protein log₂ abundance (A-C) & relative abundance in heart Left Ventricle tissue (D-F).

**
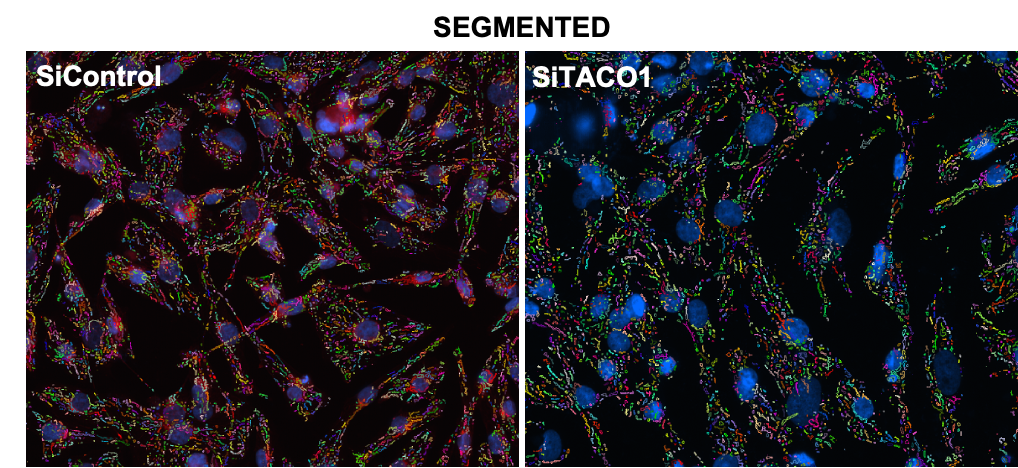
Figure S3**: Ventricular-Like hiPSCs Mitochondrial segmentation imaging.

**Figure S4**: **TACO1 loss reduces mitochondrial area and volume while increasing sphericity in HEK and HeLa cells.** (A–E) Representative 3D-reconstructed fluorescence images of the mitochondrial network (green) in HEK cells treated with DMSO control (A), Mysl22 (B), Mfi8 (C), MiclXin (D), or Taco-1 (E). Scale bar = 7 μm. (F–H) Quantification of mitochondrial area (F), volume (G), and sphericity (H) in HEK cells across all conditions, displayed as violin plots. All treatment conditions show significant reductions in mitochondrial area and volume, and significant increases in sphericity, relative to DMSO-treated controls. (I–M) Representative 3D-reconstructed fluorescence images of the mitochondrial network in HeLa cells transfected with control (I), MiCOS (J), OPA1 (K), MFN2 (L), or Taco-1 (M) siRNA. Scale bar = 7 μm. (O–Q) Quantification of mitochondrial area (O), volume (P), and sphericity (Q) in HeLa cells across all knockdown conditions, displayed as violin plots. All knockdown conditions produced significant reductions in mitochondrial area and volume, and significant increases in sphericity, compared to control siRNA-transfected cells. Data represent individual mitochondrial measurements pooled across multiple cells and biological replicates. One-way ANOVA determined statistical significance with post-hoc multiple comparisons testing. ****p < 0.0001.

**Figure S5. TACO1 knockdown drives peripheral redistribution of mitochondria in HeLA cells.**

(A) Representative MitoTracker fluorescence images of HeLA cells transfected with control, MICOS, OPA1, MFN2, or TACO1 siRNA. Concentric circle overlays (yellow) are centered on the nucleus and define five radial zones used to quantify the subcellular distribution of mitochondria: nuclear, perinuclear, central, radial, and distal. (B) Quantification of MitoTracker fluorescence intensity (expressed as a percentage of total cellular signal) within each concentric zone for control (green), MICOS (blue), OPA1 (pink), MFN2 (purple), and TACO1 (orange, hatched) knockdown conditions. TACO1 depletion results in a significant shift the mitochondrial signal toward the radial and distal zones compared with all other conditions, indicating a peripheral redistribution of the mitochondrial network. Data represent mean ± SEM. One-way ANOVA determined statistical significance using one-way ANOVA with post hoc multiple comparisons. **p < 0.01, ***p < 0.001, ****p < 0.0001.

**Figure S6**: Peripheral redistribution of mitochondria in HeLa cells (MICOS, OPA1, MFN2, TACO1).

**Table S1. Bonferroni and nominally significant circulatory and endocrine/metabolic phecodes associated with *TACO1* loss-of-function carrier status in the *All of Us* cohort.** Each row represents a phecode-defined circulatory or endocrine/metabolic phenotype nominally associated with *TACO1* predicted loss-of-function carrier status in covariate-adjusted logistic regression. Carrier status was modeled as the independent variable of interest and phecode case status as the outcome, adjusting for age at last event, sex at birth, and the first five principal components. Cases and controls indicate the numbers of participants in the analytic cohort with and without the corresponding phecode. OR, odds ratio; CI, confidence interval.

| **Phecode** | **Phenotype** | **Category** | **Cases** | **Controls** | **Beta** | **OR (95% CI)** | ***p*-value** |
| --- | --- | --- | --- | --- | --- | --- | --- |
| 395.2 | Nonrheumatic aortic valve disorders | circulatory system | 5139 | 171762 | 4.321 | 75.262 (14.182, 399.415) | 3.87e-07 |
| 430.1 | Subarachnoid hemorrhage | circulatory system | 498 | 179226 | 4.012 | 55.249 (6.673, 457.145) | 1.99e-04 |
| 459.1 | Hemorrhage NOS | circulatory system | 625 | 177729 | 3.624 | 37.485 (4.522, 310.754) | 7.83e-04 |
| 246 | Other disorders of thyroid | endocrine/metabolic | 4703 | 171988 | 2.38 | 10.808 (2.04, 57.283) | 5.14e-03 |
| 430 | Intracranial hemorrhage | circulatory system | 1526 | 177609 | 2.94 | 18.919 (2.282, 156.805) | 6.44e-03 |
| 279.11 | Deficiency of humoral immunity | endocrine/metabolic | 1098 | 178482 | 2.899 | 18.161 (2.153, 153.086) | 7.69e-03 |
| 395.3 | Nonrheumatic tricuspid valve disorders | circulatory system | 1461 | 175677 | 2.904 | 18.249 (2.145, 155.4) | 7.86e-03 |
| 429.3 | Symptoms involving cardiovascular system | circulatory system | 6518 | 164610 | 2.164 | 8.702 (1.697, 44.612) | 9.48e-03 |
| 420.2 | Pericarditis | circulatory system | 1864 | 176445 | 2.724 | 15.234 (1.837, 126.343) | 1.16e-02 |
| 244 | Hypothyroidism | endocrine/metabolic | 23137 | 152523 | 1.787 | 5.969 (1.354, 26.311) | 1.83e-02 |
| 415.2 | Chronic pulmonary heart disease | circulatory system | 2291 | 176069 | 2.416 | 11.205 (1.34, 93.691) | 2.57e-02 |
| 420 | Carditis | circulatory system | 3057 | 174419 | 2.273 | 9.705 (1.162, 81.126) | 3.59e-02 |
| 429 | Ill-defined descriptions and complications of heart disease | circulatory system | 9915 | 159399 | 1.725 | 5.613 (1.074, 29.371) | 4.10e-02 |
| 250.41 | Impaired fasting glucose | endocrine/metabolic | 9523 | 166436 | 1.72 | 5.584 (1.05, 29.666) | 4.36e-02 |

**
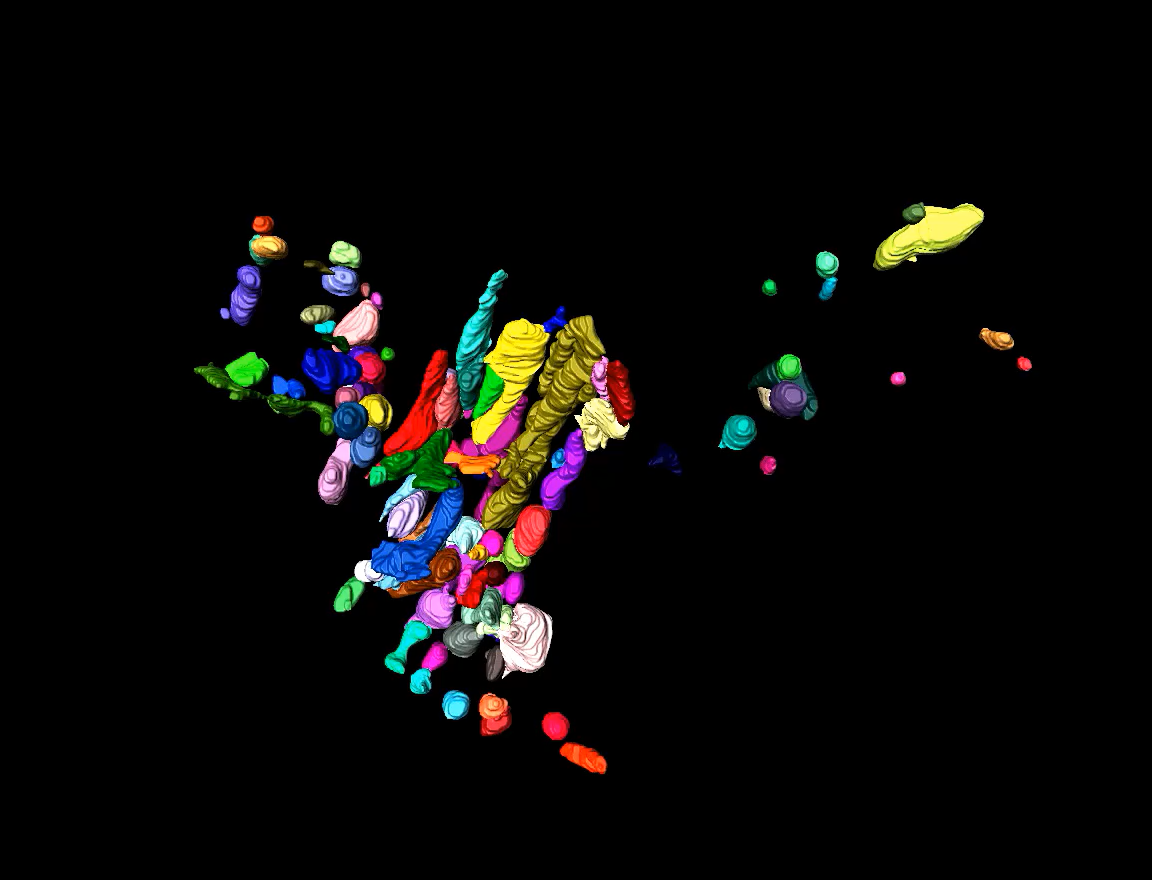
**
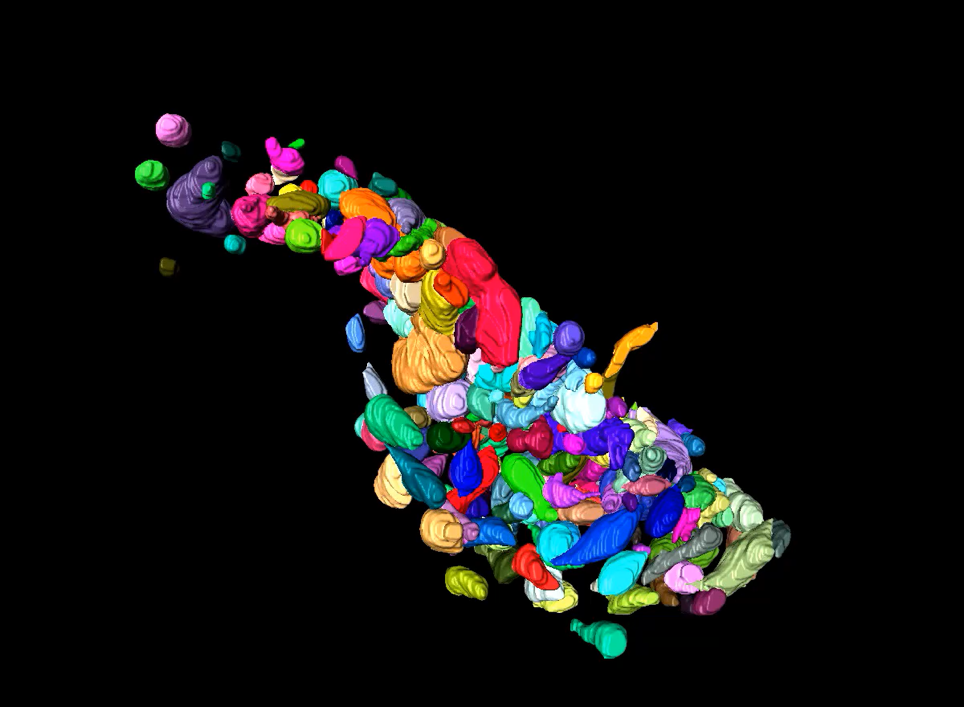
**Movie 1**: Representative video of three-dimensional mitochondrial reconstructions from Serial Block-Face Scanning Electron Microscopy volumes of heart failure sample. Rotational visualization of mitochondrial reconstruction from Subsarcolemmal in a heart failure subject.

Subsarcolemmal

**Intermyofibrillar**

**Movie 2**: Representative video of three-dimensional mitochondrial reconstructions from Serial Block-Face Scanning Electron Microscopy volumes of heart failure sample. Rotational visualization of mitochondrial reconstruction from Intermyofibrillar in a heart failure subject.

**Perinuclear**

**
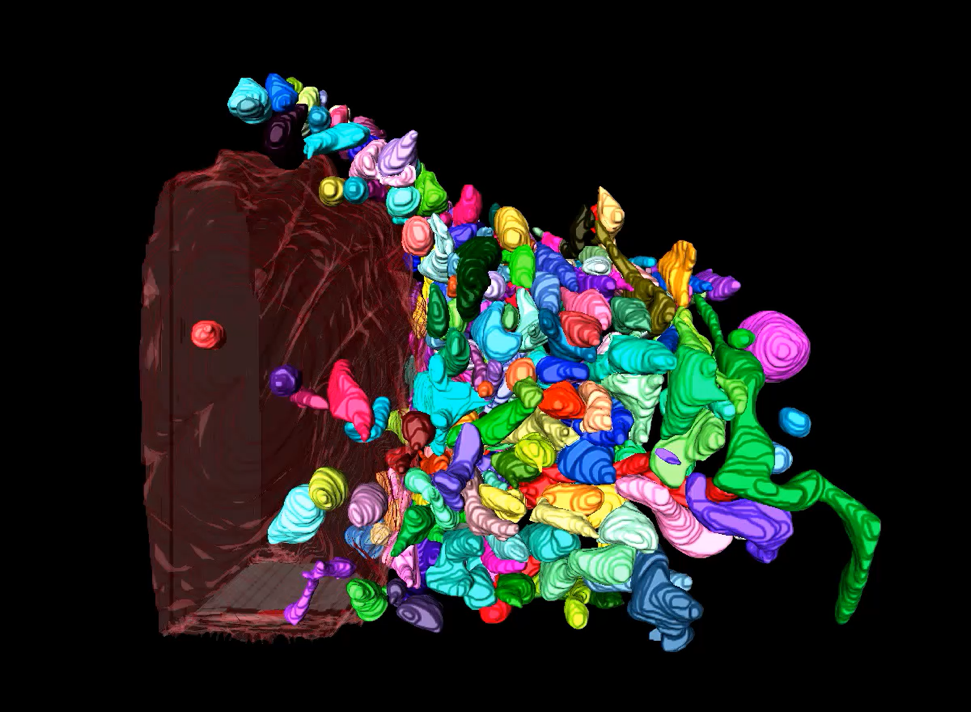
**

**Movie 3**: Representative video of three-dimensional mitochondrial reconstructions from Serial Block-Face Scanning Electron Microscopy volumes of heart failure sample. Rotational visualization of mitochondrial reconstruction from Perinuclear in a heart failure subject.
